# Supplementary material for: An intracellular nanobody targeting T4SS effector inhibits Ehrlichia infection
Source: PubMed Central journal article supplement — Proc Natl Acad Sci U S A. 2021 Apr 26;118(18):e2024102118. doi: 10.1073/pnas.2024102118 (PMC8106314; doi:10.1073/pnas.2024102118), 2021-04-26
Supplement: pnas.2024102118.sapp.pdf [file pnas.2024102118.sapp.pdf]

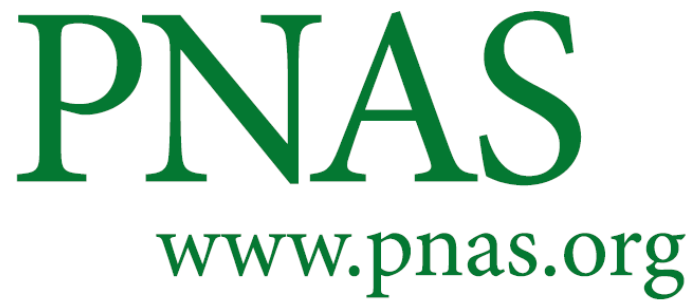

**Supplementary Information for:**

**An Intracellular Nanobody Targeting T4SS Effector Inhibits *Ehrlichia* Infection**

Wenqing Zhang<sup>1</sup>, Mingqun Lin<sup>1</sup>, Qi Yan<sup>1</sup>, Khemraj Budachetri<sup>1</sup>, Libo Hou<sup>1</sup>, Ashweta Sahni<sup>2</sup>,  
Hongyan Liu<sup>1</sup>, Nien-Ching Han<sup>3</sup>, Jeffrey Lakritz<sup>4</sup>, Dehua Pei<sup>2</sup> and Yasuko Rikihisa<sup>1,3\*</sup>

<sup>1</sup> Department of Veterinary Biosciences, <sup>2</sup> Department of Chemistry and Biochemistry,

<sup>3</sup> Department of Microbiology, <sup>4</sup> Department of Veterinary Preventive Medicine,

The Ohio State University, Columbus, OH 43210

\* Corresponding author: Yasuko Rikihisa

Email: [rikihisa.1@osu.edu](mailto:rikihisa.1@osu.edu)

**This PDF file includes:**

Tables S1 to S2

Figures S1 to S5

## Supplementary Tables

**Table S1. Etf-1 homologs in members of the genera *Ehrlichia* and *Anaplasma***

| Species                                                      | NCBI accession number | Similarity (% aa) | E-Value            |
|--------------------------------------------------------------|-----------------------|-------------------|--------------------|
| <b><i>Ehrlichia</i> species<sup>1</sup></b>                  |                       |                   |                    |
| <b><i>E. muris</i> subsp. <i>muris</i> AS145</b>             | WP_024071892.1        | 79                | 1E <sup>-166</sup> |
| <b><i>E. muris</i> subsp. <i>eaucalarensis</i> Wisconsin</b> | WP_045804476.1        | 76                | 1E <sup>-130</sup> |
| <b><i>Ehrlichia</i> sp. HF</b>                               | WP_044195177.1        | 77                | 2E <sup>-155</sup> |
| <b><i>E. minasensis</i> UFMG-EV</b>                          | WP_045170612.1        | 75                | 1E <sup>-159</sup> |
| <b><i>E. canis</i> Jake</b>                                  | WP_102574816.1        | 74                | 7E <sup>-157</sup> |
| <b><i>E. ruminantium</i> Welgevonden</b>                     | WP_065433648.1        | 63                | 4E <sup>-100</sup> |
| <b><i>Anaplasma</i> species<sup>2</sup></b>                  |                       |                   |                    |
| <b><i>A. platys</i> Mili1</b>                                | WP_169193309.1        | 52                | 1E <sup>-56</sup>  |
| <b><i>A. centrale</i> Israel</b>                             | WP_012880860.1        | 57                | 4E <sup>-36</sup>  |
| <b><i>A. ovis</i> Haibei</b>                                 | WP_075138831.1        | 55                | 1E <sup>-31</sup>  |
| <b><i>A. marginale</i> Florida</b>                           | WP_010269731.1        | 56                | 3E <sup>-31</sup>  |

<sup>1</sup> *E. chaffeensis* Arkansas Etf-1 protein (WP\_011452831.1, 380 aa) was used to perform a BLASTP search against the NCBI RefSeq protein database among representative *Ehrlichia* species.

<sup>2</sup> *Anaplasma phagocytophilum* encodes Ats-1 protein (ABD43383.2, 376 aa), which is 41% similar to *E. chaffeensis* Arkansas Etf-1 protein (E-value: 6E<sup>-13</sup>) and was used to perform a BLASTP search against the NCBI RefSeq protein database among representative *Anaplasma* species.

**Table S2. Primer sequences for cloning truncated and mutated Etf-1 and Nbs <sup>1</sup>**

| <b>Etf-1 AA Residues</b>                                                                                                | <b>Primer sequence (5'–3')</b>                                                                                                                                                                                            |
|-------------------------------------------------------------------------------------------------------------------------|---------------------------------------------------------------------------------------------------------------------------------------------------------------------------------------------------------------------------|
| <b>Cloning truncations of Etf-1 into pET33b(+) for expression in <i>E. coli</i> BL21(DE3)</b>                           |                                                                                                                                                                                                                           |
| 1–380                                                                                                                   | F: GGAATTCCATATGGAACCTGTATTTTCAGGGCATGCTTACTTTCTTAAAG<br>R: CGCGGATCCTTATTCATGCCATTCAATTTTCTGCGCTTCAAAAATATCGTTCA<br>GGCCTCTTGCATGTAC                                                                                     |
| 26–380                                                                                                                  | F: GGAATTCCATATGGAACCTGTATTTTCAGGGCCATCAAGAAAGCGTAGGT<br>R: CGCGGATCCTTATTCATGCCATTCAATTTTCTGCGCTTCAAAAATATCGTTCA<br>GGCCTCTTGCATGTAC                                                                                     |
| 51–380                                                                                                                  | F: GGAATTCCATATGGAACCTGTATTTTCAGGGCAAACACTTTGACTTAAGA<br>R: CGCGGATCCTTATTCATGCCATTCAATTTTCTGCGCTTCAAAAATATCGTTCA<br>GGCCTCTTGCATGTAC                                                                                     |
| 80–380                                                                                                                  | F: GGAATTCCATATGGAACCTGTATTTTCAGGGCGAAGTAGCTCTGAAAGTA<br>R: CGCGGATCCTTATTCATGCCATTCAATTTTCTGCGCTTCAAAAATATCGTTCA<br>AGGCTCTTGCATGTAC                                                                                     |
| 113–380                                                                                                                 | F: GGAATTCCATATGGAACCTGTATTTTCAGGGCACTAAAAAAGATACCTTA<br>R: CGCGGATCCTTATTCATGCCATTCAATTTTCTGCGCTTCAAAAATATCGTTCA<br>GGCCTCTTGCATGTAC                                                                                     |
| <b>Cloning truncations and point-mutations of codon-optimized Etf-1 into pEGFP-N1 for expression in mammalian cells</b> |                                                                                                                                                                                                                           |
| 1–380                                                                                                                   | F: AGTGCTAGCC <b>CGCCACC</b> ATGGTGCTGACCTTCCTGAAG<br>R: CAAGAATTCTGTCTGGCATGCACCTTTCC                                                                                                                                    |
| 1–306                                                                                                                   | F: AGTGCTAGCC <b>CGCCACC</b> ATGGTGCTGACCTTCCTGA<br>R: CAAGAATTCTGGGTCCGAGAATAAGGCATA                                                                                                                                     |
| ΔCoil1 <sup>2</sup>                                                                                                     | Etf-1-Opt-F: AGTGCTAGCC <b>CGCCACC</b> ATGGTGCTGACCTTCCTGAAG<br>ΔCoil1-R: CCGGGAGTGCTGTTCACTGT GAACTCCTGGGTGGCTGACA;<br>ΔCoil1-F: TGTCAGCCACCCAGGAGTTC ACAGTGAACAGCACTCCCGG<br>Etf-1-Opt-R: CAAGAATTCTGTCTGGCATGCACCTTTCC |
| 1–380 (K6,7A)                                                                                                           | F: AGTGCTAGCC <b>CGCCACC</b> ATGGTGCTGACCTTCCTG <b>GCCGCT</b> GGCGCCAACG<br>R: CAAGAATTCTGTCTGGCATGCACCTTTCC                                                                                                              |
| 21–380                                                                                                                  | F: AGTGCTAGCC <b>CGCCACC</b> ATGGTGACCACAAGCAAGCTGCCTC<br>R: CAAGAATTCTGTCTGGCATGCACCTTTCC                                                                                                                                |
| 21–380 (K23A)                                                                                                           | F: AGTGCTAGCC <b>CGCCACC</b> ATGGTGACCACAAGC <b>GCT</b> CTGCCTC<br>R: CAAGAATTCTGTCTGGCATGCACCTTTCC                                                                                                                       |
| 23–380                                                                                                                  | F: AGTGCTAGCC <b>CGCCACC</b> ATGGTGAAGCTGCCTCACCAGGAGTC<br>R: CAAGAATTCTGTCTGGCATGCACCTTTCC                                                                                                                               |
| 25–380                                                                                                                  | F: AGTGCTAGCC <b>CGCCACC</b> ATGGTGCCTCACCAGGAGTCCGTG<br>R: CAAGAATTCTGTCTGGCATGCACCTTTCC                                                                                                                                 |

<sup>1</sup> F, forward primer; R, reverse primer; underlined, restriction enzyme sites; bold, Kozak sequences for mammalian cell expression; bold and italicized, point mutations.

<sup>2</sup> The first-step PCR amplification used primer pairs Etf-1-Opt-F/ΔCoil-1R and ΔCoil-1F/Etf-1-Opt-R, and both first-step PCR products were combined and further amplified by the second-step PCR using primer pairs Etf-1-Opt-F and Etf-1-Opt-R.

| Cloning anti-Etf-1 Nbs into pEGFP-C1 for expression in mammalian cells |                                                                                                    |
|------------------------------------------------------------------------|----------------------------------------------------------------------------------------------------|
| Full length                                                            | F: CTAGCTAGCGCTACCGGT <b>CGCCACCATGG</b> CCCAGGTGCAGCTGCAG<br>R: CCGGAATTCTTATCAGGAACCGTAGTCCGGAAC |

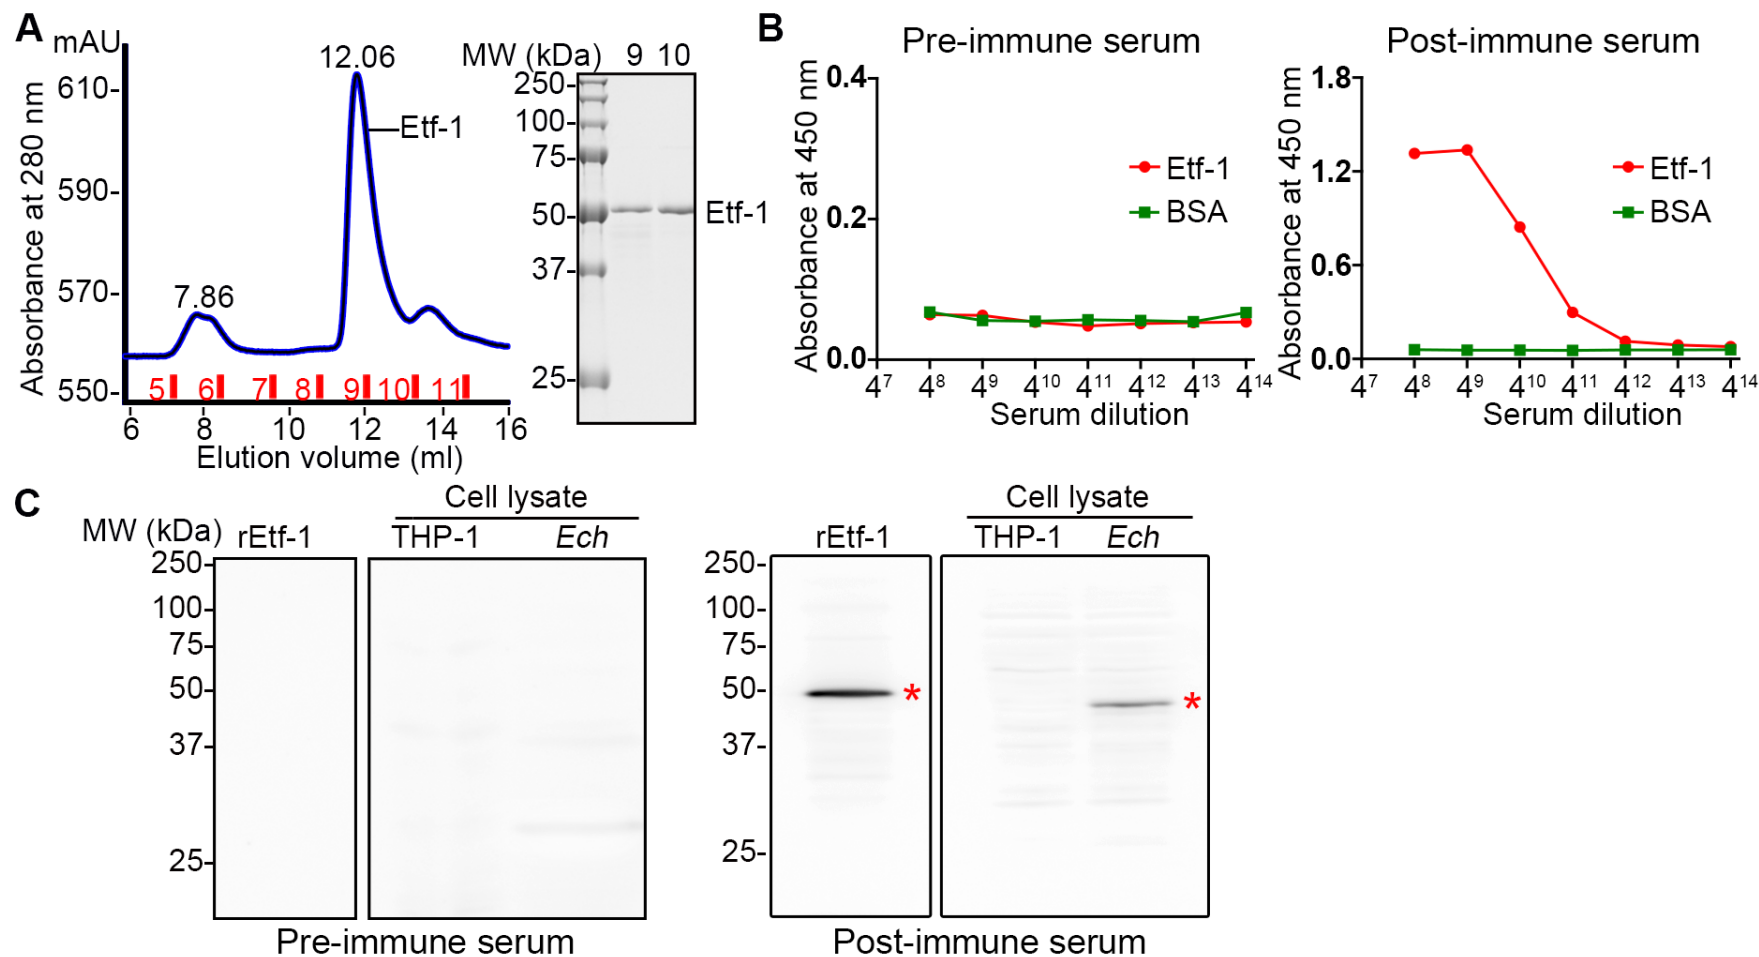

**FIG S1. Llama immunization with rEtf-1.** (A) The recombinant full-length Etf-1 protein (rEtf-1, 380 aa) was purified by gel filtration. The indicated peak fractions (fractions 9 and 10) were analyzed by SDS-PAGE and Coomassie blue staining. (B) Etf-1-specific antibody response of pre- and post-immune serum was analyzed by ELISA, and BSA was used as a negative control. Sera samples were prepared as four-fold serial dilutions. (C) Western blot analysis of the llama pre- and post-immune sera against recombinant and native Etf-1. *Ech*, cell lysate of *E. chaffeensis*-infected THP-1 cells at 3 dpi; THP-1, uninfected THP-1 cell lysate. Red asterisks, recombinant and native Etf-1. Llama sera were pre-adsorbed using uninfected THP-1 cell lysates to reduce non-specific interacting bands.

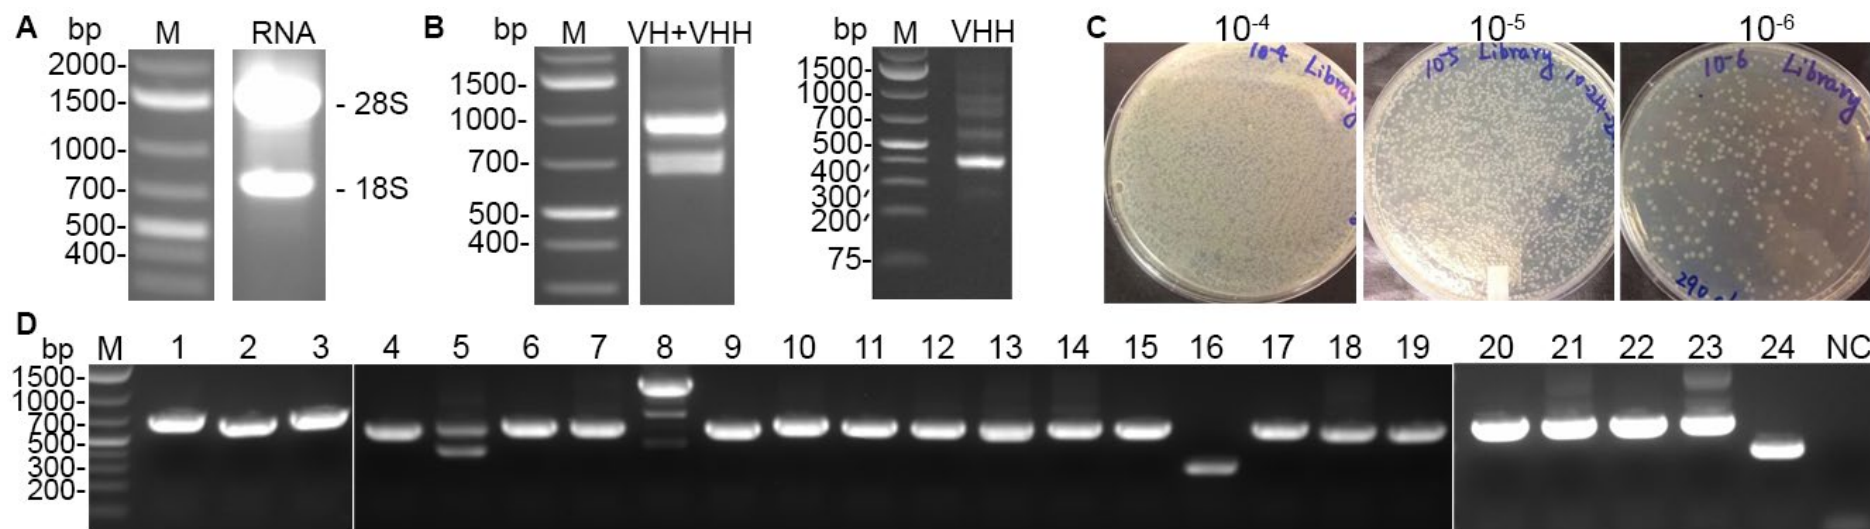

**FIG S2. Cloning of anti-Etf-1 Nbs from the llama immune library.** (A) Agarose gel electrophoresis of total RNA purified from PBLs of the Etf-1 protein-immunized llama. M, molecular weight marker (GeneRuler 1 kb Plus DNA Ladder). (B) Agarose gel electrophoresis of the variable domains of all immunoglobulin heavy chains (VHs and VHHs) amplified from cDNA (VH + VHH, left), and Nb-encoding genes re-amplified from the gel-purified VH + VHH PCR products (VHH, right). (C) Library size determination by serial dilutions shown as colonies on LB-agar plates (290 clones at 10<sup>-6</sup> dilution). (D) Colony PCR for assessing the percentage of clones in the library with the proper insert. Twenty-four isolated colonies were randomly picked from the transformants, and DNA was extracted from each. The amplicon size for clones with a Nb gene insert is ~700 bp. Transformants without a Nb gene insert have a smaller amplicon size (~350 bp).

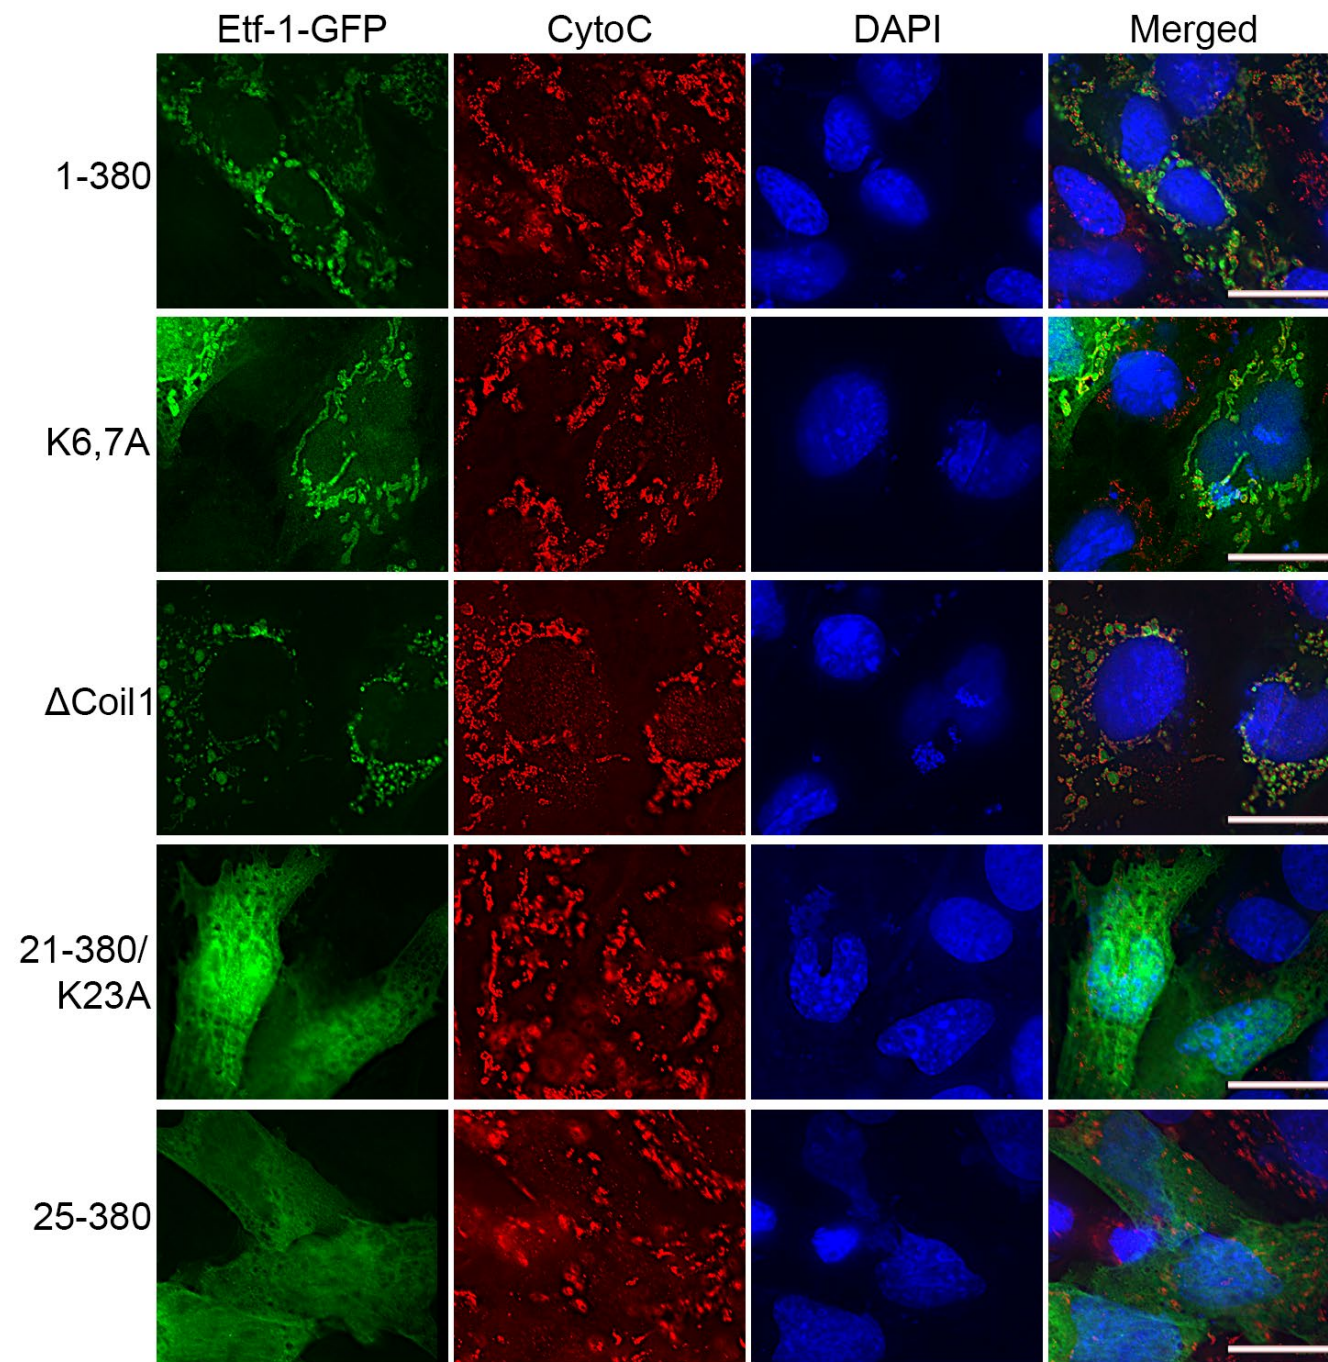

**FIG S3. K23 within the N-terminal 24 aa of Etf-1 is critical for mitochondrial targeting.**

Immunofluorescence labeling of RF/6A cells transfected with truncated, internal deletion, or point mutations of Etf-1-GFP (as described in Fig. 3). Cells were labeled with mouse monoclonal anti-cytochrome c (CytoC; red). Representative images show the presence (full-length, 1-380 aa; K6,7A; and ΔCoil1) and absence (21-380/K23A and 25-380 aa) of Etf-1 colocalization with mitochondria. Colocalization was quantified and is presented in Fig. 3. Scale bars: 15 μm.

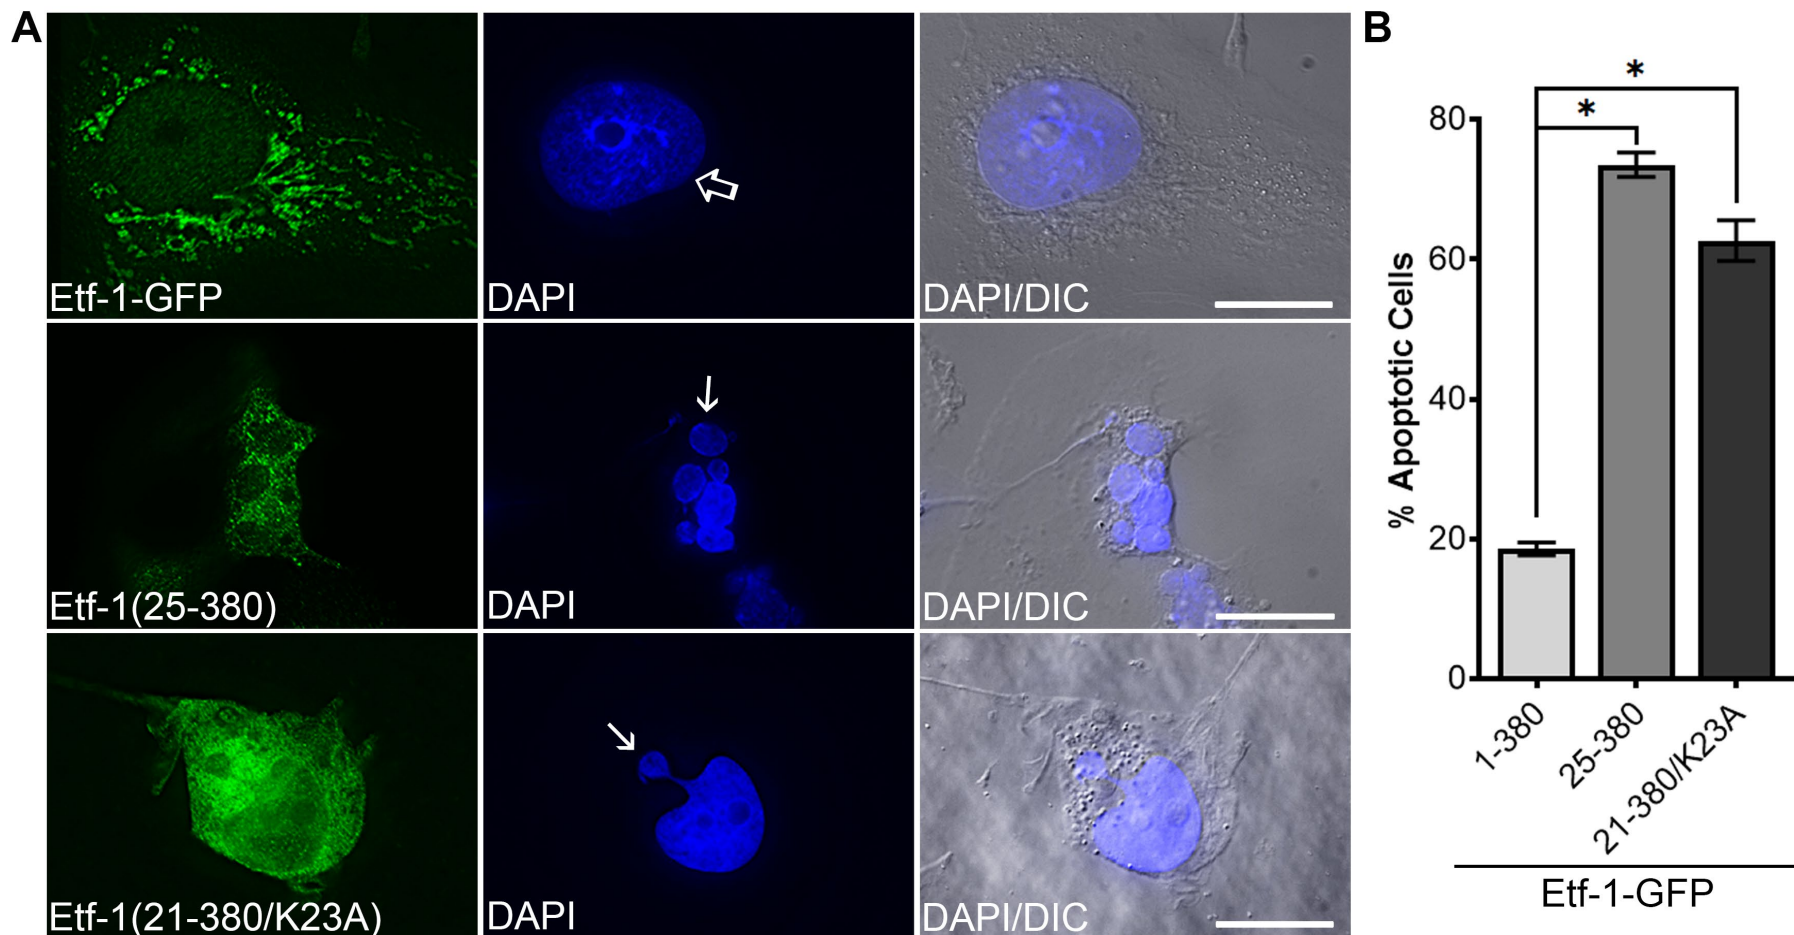

**FIG S4. K23 within the N-terminal 24 aa of Etf-1 is critical for inhibition of etoposide-induced apoptosis.**

(A) RF/6A cells were transfected with plasmids expressing Etf-1-GFP (full length, 1-380 aa), Etf-1(21-380/K23A)-GFP, or Etf-1(25-380)-GFP. At 28 h pt, cells were treated with 100  $\mu$ M etoposide for 41 h. Cells were fixed by 4% PFA, and the host cell nuclei were stained with DAPI. Immunofluorescence labeling of RF/6A cells. DIC, differential interference contrast; arrows: apoptotic nuclei; open arrow: normal nuclei. Scale bar, 10  $\mu$ m. (B) Quantification of apoptosis (nuclear fragmentation) in 100 cells expressing transfected genes. Data are represented as the mean  $\pm$  standard deviation ( $n = 3$ ). \*  $P < 0.05$  by one-way ANOVA.

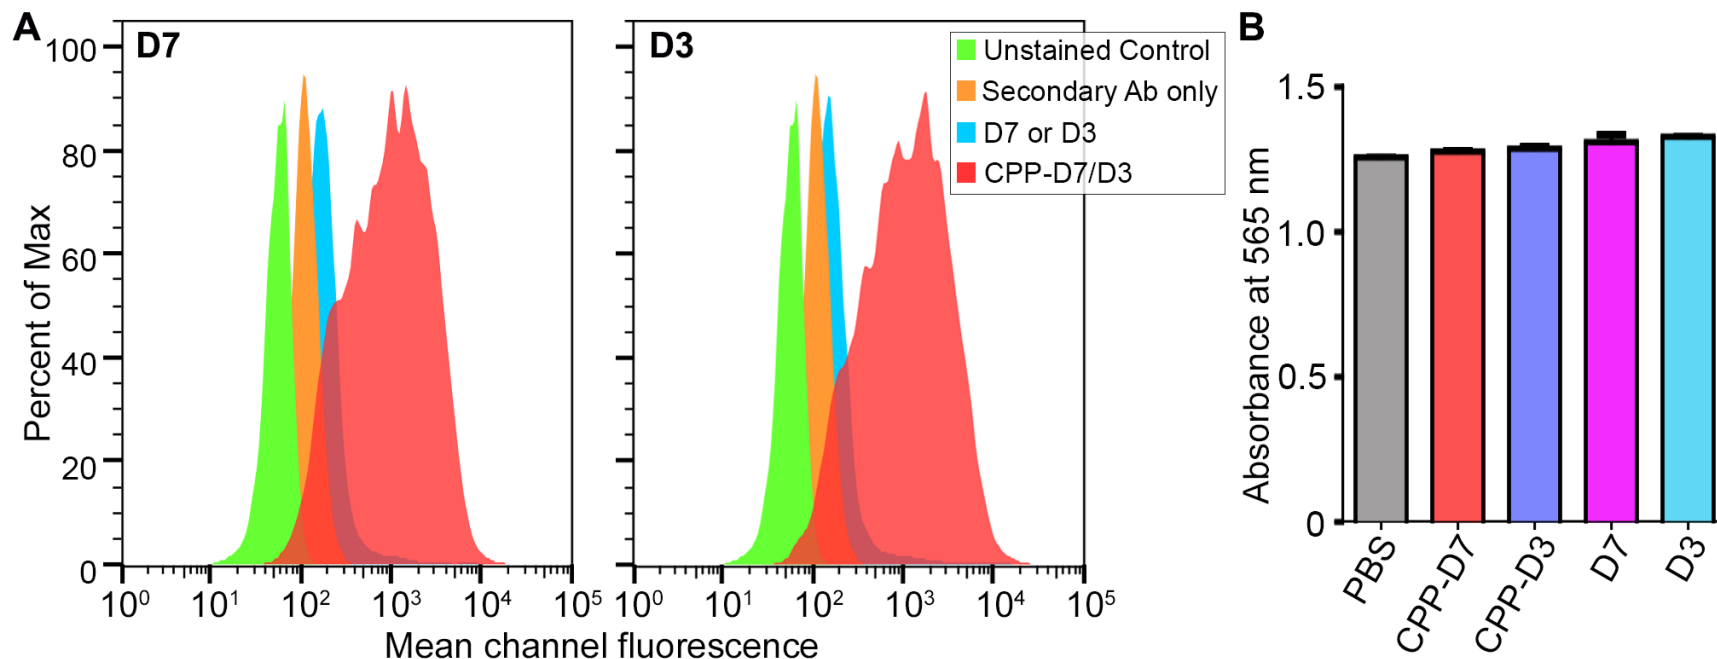

**Fig. S5. CPP-Nbs have high intracellular uptake efficiency without any cytotoxicity.** (A) Flow cytometry histograms showing intracellular levels of CPP-Nbs and of Nbs alone. There was a substantial increase in the fluorescence of cells incubated with CPP-Nb as compared with that of cells incubated with Nb or PBS with/without secondary antibody labeling. (B) Cytotoxicity of CPP-Nbs, Nbs, and PBS was measured using the MTT assay. Values are represented as the mean  $\pm$  standard deviation ( $n = 3$ ).
